# Supplementary material for: Interaction of mature CD3+CD4+ T cells with dendritic cells triggers the development of tertiary lymphoid structures in the thyroid
Source: JCI journal article supplement (doi:10.1172/jci28993), 2006-10-02
Supplement: sd1 [file 1]

Supplemental figure 1

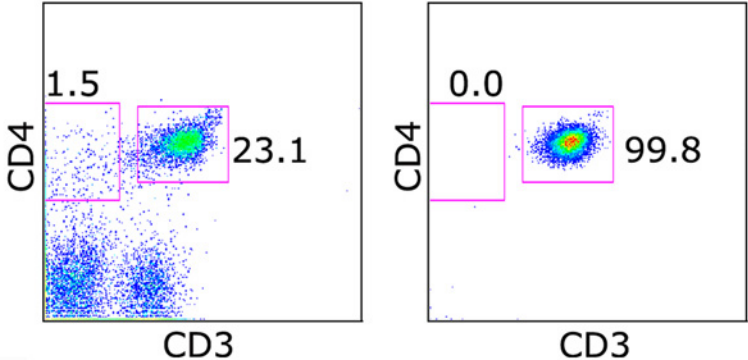

Supplemental figure 2

RAG

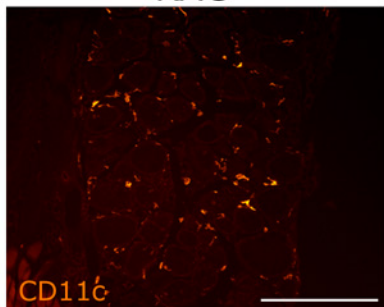

RAGTGCCL21

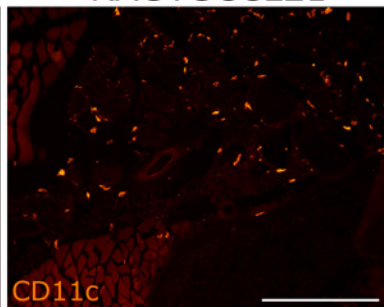

RAGTGCCL21/CCR7<sup>-/-</sup>

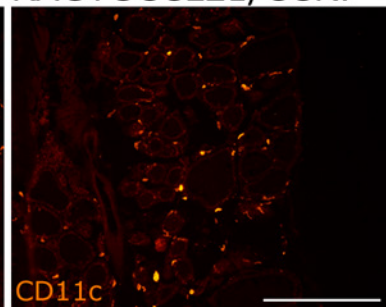

Supplemental figure 3

WT ->RAGTGCCL21

ID2<sup>-/-</sup> ->RAGTGCCL21

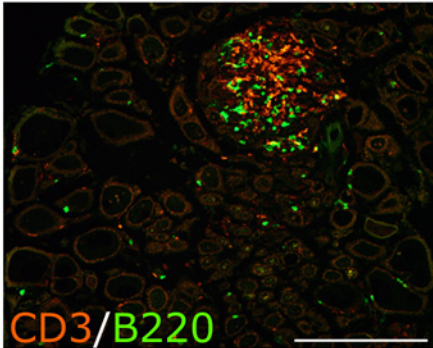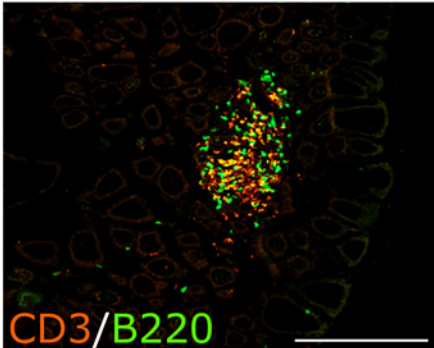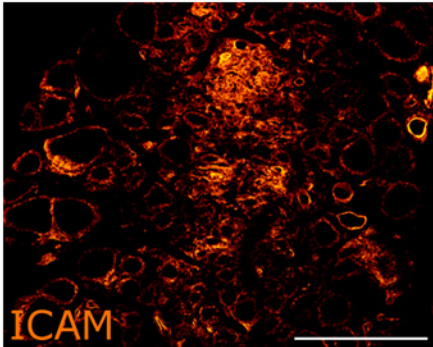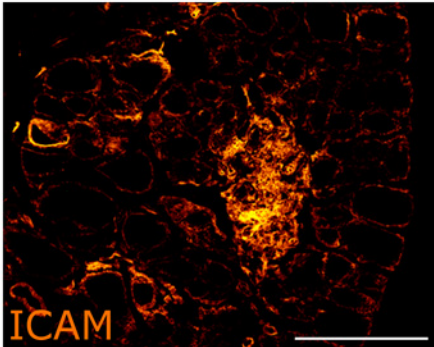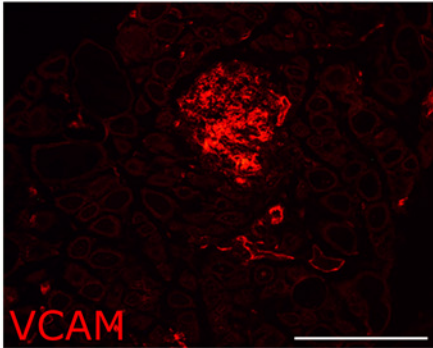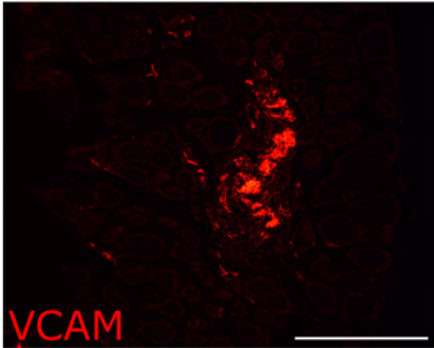

# Supplemental figure 4

C57Bl/6 spl -> RAGTGCCL21

TGCCL21

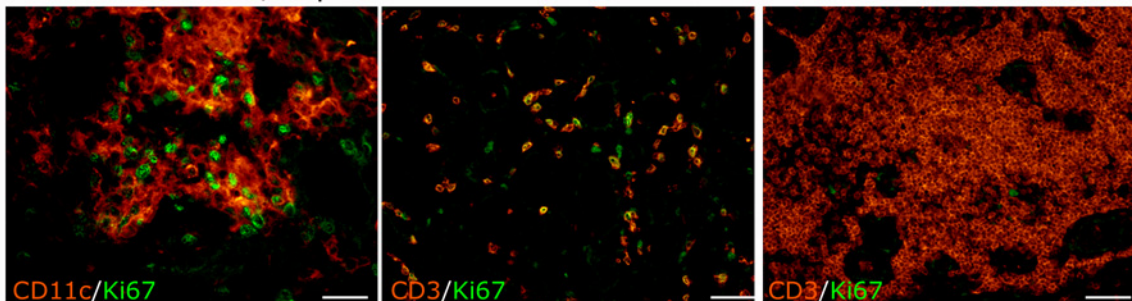

# Supplemental Figure 5

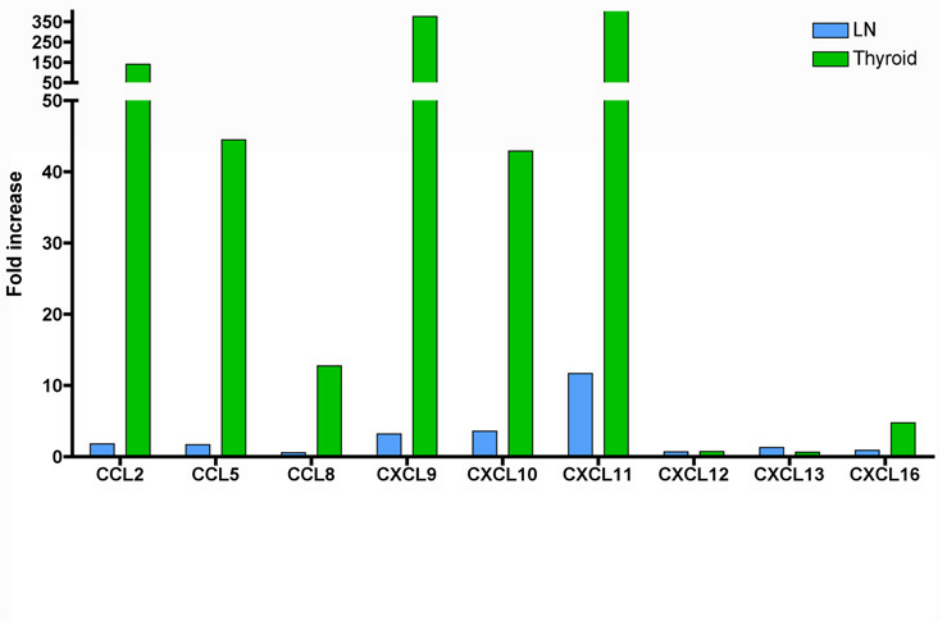

***Supplemental Figure 1. Sorting of GFP<sup>+</sup>CD3<sup>+</sup>CD4<sup>+</sup> T cells.*** GFP<sup>+</sup> splenic cells were stained with directly conjugated anti-CD3 and anti-CD4 antibodies and sorted. The relative number of CD3<sup>-</sup>CD4<sup>+</sup> and CD3<sup>+</sup>CD4<sup>+</sup> cells prior and after sorting are presented.

***Supplemental Figure 2. The expression of CCL21 in the thyroid of RAG mice does not induce DC clustering.*** Thyroids of RAG, RAGTGCCL21 and RAGTGCCL21/CCR7<sup>-/-</sup> mice were stained with anti-CD11c antibody to visualize dendritic cells. Representative sections for each genotype are shown (n=3 mice). Scale bars represent 0.25mm.

***Supplemental Figure 3. Id2-deficient splenocytes induce expression of adhesion molecules in the thyroid of RAGTGCCL21 mice.*** 10<sup>7</sup> splenocytes isolated from wild type or Id2<sup>-/-</sup> mice were transferred into RAGTGCCL21 mice. Shown are representative sections of the thyroid of recipient mice (n=3) thirty days after transfer. Both T (CD3) and B (B220) cells are present. ICAM and VCAM were also expressed within and around the lymphocytic infiltrate. Scale bars represent 0.25mm.

***Supplemental Figure 4. CD11c<sup>+</sup> cells infiltrate the thyroid of RAGTGCCL21 mice after adoptive transfer of splenocytes.*** RAGTGCCL21 mice were injected with 10<sup>7</sup> splenocytes isolated from C57Bl/6 mice. Proliferation of CD11c<sup>+</sup> and CD3<sup>+</sup> cells in the thyroid was assayed using Ki67 antibody 5 days later. In contrast to high proliferation rate of CD3<sup>+</sup> cells in the initial phase of infiltrate formation, very few CD3<sup>+</sup> cells proliferate in well-established lymphoid organ in the thyroid of TGCCL21 mice. Results are representative of 3 separate experiments (>20 sections). Scale bars represent 0.10 mm.

***Supplemental Figure 5. Chemokine expression in thyroid and lymph nodes after adoptive transfer of CD3<sup>+</sup>CD4<sup>+</sup> T cells.*** Total RNA was isolated from the thyroid and lymph nodes of RAG and RAGTGCCL21 mice injected with 10<sup>6</sup> CD3<sup>+</sup>CD4<sup>+</sup> T cells for 10 days. The relative levels of mRNA of indicated chemokines were determined by quantitative PCR performed in duplicates. Values present fold induction in chemokine mRNA expression between RAGTGCCL21 vs. RAG mice.
